# Ocean Acidification Affects Prey Detection by a Predatory Reef Fish

Ingrid L. Cripps<sup>1\*</sup>, Philip L. Munday<sup>1,2</sup>, Mark I. McCormick<sup>1,2</sup>

**1** School of Marine and Tropical Biology, James Cook University, Townsville, Australia, **2** Australian Research Council Centre of Excellence for Coral Reef Studies, James Cook University, Townsville, Australia

## Abstract

Changes in olfactory-mediated behaviour caused by elevated CO<sub>2</sub> levels in the ocean could affect recruitment to reef fish populations because larval fish become more vulnerable to predation. However, it is currently unclear how elevated CO<sub>2</sub> will impact the other key part of the predator-prey interaction – the predators. We investigated the effects of elevated CO<sub>2</sub> and reduced pH on olfactory preferences, activity levels and feeding behaviour of a common coral reef meso-predator, the brown dottedback (*Pseudochromis fuscus*). Predators were exposed to either current-day CO<sub>2</sub> levels or one of two elevated CO<sub>2</sub> levels (~600 µatm or ~950 µatm) that may occur by 2100 according to climate change predictions. Exposure to elevated CO<sub>2</sub> and reduced pH caused a shift from preference to avoidance of the smell of injured prey, with CO<sub>2</sub> treated predators spending approximately 20% less time in a water stream containing prey odour compared with controls. Furthermore, activity levels of fish was higher in the high CO<sub>2</sub> treatment and feeding activity was lower for fish in the mid CO<sub>2</sub> treatment; indicating that future conditions may potentially reduce the ability of the fish to respond rapidly to fluctuations in food availability. Elevated activity levels of predators in the high CO<sub>2</sub> treatment, however, may compensate for reduced olfactory ability, as greater movement facilitated visual detection of food. Our findings show that, at least for the species tested to date, both parties in the predator-prey relationship may be affected by ocean acidification. Although impairment of olfactory-mediated behaviour of predators might reduce the risk of predation for larval fishes, the magnitude of the observed effects of elevated CO<sub>2</sub> acidification appear to be more dramatic for prey compared to predators. Thus, it is unlikely that the altered behaviour of predators is sufficient to fully compensate for the effects of ocean acidification on prey mortality.

**Citation:** Cripps IL, Munday PL, McCormick MI (2011) Ocean Acidification Affects Prey Detection by a Predatory Reef Fish. PLoS ONE 6(7): e22736. doi:10.1371/journal.pone.0022736

**Editor:** Attila Szolnoki, Hungarian Academy of Sciences, Hungary

**Received:** February 5, 2011; **Accepted:** July 5, 2011; **Published:** July 28, 2011

**Copyright:** © 2011 Cripps et al. This is an open-access article distributed under the terms of the Creative Commons Attribution License, which permits unrestricted use, distribution, and reproduction in any medium, provided the original author and source are credited.

**Funding:** This work was financed by the ARC Centre of Excellence for Coral Reef Studies (Grant 95917), James Cook University, and AIMS@JCU. PLM was supported by an Australian Research Council Fellowship. The funders had no role in study design, data collection and analysis, decision to publish, or preparation of the manuscript.

**Competing Interests:** The authors have declared that no competing interests exist.

\* E-mail: ingrid.cripps@gmail.com

## Introduction

Growing evidence suggests that ocean acidification, caused by rapidly increasing anthropogenic CO<sub>2</sub> emissions, will have significant and widespread impacts on marine life [1–3]. Based on current emission trajectories, atmospheric CO<sub>2</sub> concentrations are predicted to reach 730–1,020 parts per million (ppm) by the end of the century [4]. Corresponding increases in CO<sub>2</sub> dissolved in the ocean may cause a reduction of 0.3–0.4 units in oceanic pH compared to current-day levels [5–6]. This departure from current-day pH levels would occur at a faster rate than has been seen at any time over the past two million years, potentially limiting the abilities of populations to adapt to such a rapid change [6–7].

The potential impact of ocean acidification on the growth and survival of marine calcifiers is well established [8–13], however the likely effects of elevated CO<sub>2</sub> and reduced pH on non-calcifying organisms, such as marine fishes, is still poorly understood. Recent research has demonstrated that the ability of larval fish to detect ecologically important cues is hindered by ocean acidification [14–17]. Larval clownfish exposed to elevated CO<sub>2</sub> levels were unable to distinguish olfactory cues for suitable adult habitat, parental

scent [14] and predator odour [15]. This impairment of predator cue recognition, combined with changes in behavioural boldness, was associated with a 5–9 times higher rate of mortality from predation for newly settled larvae that were reared in elevated CO<sub>2</sub> compared with controls [18]. Such dramatic changes in mortality could have potentially serious implications for population replenishment and ecosystem diversity [18]. However, the effects of ocean acidification on predators, which are the determinant of prey mortality rates, are yet to be addressed. If ocean acidification affects both predators and prey equally, there may be no net effect on mortality rates.

Predators are vital for the maintenance of ecosystem health and for structuring marine communities [19–21]. Predation alters the community dynamics of marine populations through the reduction of prey abundance [22–23] and may influence species diversity [24–25]. However, not all predators are functionally equal, with different species exerting effects on particular species or size classes of prey. On coral reefs, predation has a highly significant effect on the recruitment rates of newly settled fishes. Upon settling to the benthos, larvae are subjected to high rates of mortality, with up to 60% of recruits consumed within the first two days of settlement [20,26]. Small reef-associated predatory fishes (meso-predators)

that feed opportunistically on recruits are the major agents of this mortality [27–29].

Various sensory systems are employed in the feeding process of meso-predators, which involves; searching, detection, capture and ingestion [30]. Predators are particularly reliant on chemical and visual cues to detect prey [31]. Visual cues can be limited in aquatic environments due to habitat complexity, turbidity from suspended sediments and low light conditions [32]. Additionally, the solvent properties of water and the high persistence of chemical cues render the sense of olfaction particularly useful in marine environments [33–35]. Olfactory cues are likely to be important for meso-predators due to the small spatial scales over which they act and the topographic complexity of coral reefs. Particularly important for both predators and prey are chemical alarm cues (skin extracts), released upon mechanical damage to the skin of prey species [36]. Prey seek shelter and reduce activity levels when alarm cues are detected, whereas predators are directly attracted to chemical alarm cues of their prey [37–38].

Predation events involve two parties, predator and prey. While evaluations have been conducted on the response of prey species to ocean acidification [14–16,18], research is yet to address the threat of ocean acidification from a predator's perspective. Therefore, in this study we aimed to investigate the influences of ocean acidification on the behaviour of a common coral reef meso-predator; the brown dottyback *Pseudochromis fuscus* (Pseudochromidae). Firstly, the effects of elevated CO<sub>2</sub> on the olfactory abilities of *P. fuscus* was evaluated using olfactory pairwise choice tests. The response of predators to prey skin extract was assessed following exposure to control (current-day CO<sub>2</sub>) or one of two elevated CO<sub>2</sub> levels (~600 µatm or ~950 µatm CO<sub>2</sub>) which match low- and high-end predictions of conditions that could occur in the ocean by 2100 according to future climate change scenarios [4,39]. Secondly, the effects of similar levels of elevated CO<sub>2</sub> on the activity levels and feeding behaviour of *P. fuscus* was investigated using behavioural assays. Understanding the effects on both predator and prey fish is crucial for determining the potential impacts of future ocean acidification on this relationship.

## Materials and Methods

### Study site and specimen collection

This study was conducted at Lizard Island Research Station (LIRS; 14°40'S, 145°28'E) in the northern section of the Great Barrier Reef (GBR) between March and April 2010. Experiments used the flow-through seawater system at LIRS, and the study species was collected from the nearby fringing reefs. The model predator species was *P. fuscus*, which is a common meso-predator on the GBR. *P. fuscus* occurs in high densities at Lizard Island, and is known to have a significant effect on population dynamics of common damselfish species by opportunistically feeding on recently settled juveniles [29]. *P. fuscus* were collected from shallow water reefs (~6 m) in the Lizard Island lagoon with the aid of a mild anesthetic mixture of ethanol, clove oil and seawater [40] and caught using hand-nets. Captured fish were placed in large plastic bags and transported to the research station. Fish were transferred to replicate 35 L aquariums supplied with a continuous flow of seawater diffused with one of three different CO<sub>2</sub> treatments (see ocean acidification system). Prior to experimentation, *P. fuscus* (Total Length (TL); 64.07±1.31 mm; mean ± SE) were kept in treatment for four-seven days. Preliminary trials indicated that treatment with enriched CO<sub>2</sub> for this period of time was sufficient to alter olfactory-mediated behaviour, as observed in studies conducted on different species [18]. Two fish were held in each aquarium, divided by a plastic mesh barrier in the centre of the

tank and all were fed INVE Aquaculture Nutrition pellets once daily.

Juvenile lemon damselfish, *Pomacentrus moluccensis*, (Pomacentridae) were chosen as the 'prey' species from which damaged-skin-extracts were sourced as they are known prey of *Pseudochromis fuscus* [29,41] and have been used in previous chemical alarm cue experiments. *Pomacentrus moluccensis* were collected by using the same methods described above, held in 57 L tanks and fed *ad libitum* with freshly hatched *Artemia* nauplii. All procedures were approved by James Cook University Animal Ethics Committee (A1511).

### Seawater system

*P. fuscus* were held for four – seven days in aquariums containing either control seawater or water enriched with CO<sub>2</sub>. Seawater was pumped from the ocean into 3×60 L sumps where it was diffused with air (control) or CO<sub>2</sub> to achieve a pH of approximately 8.15 (control), 8.00 (mid) or 7.90 (high). A pH-controller (Tunze Aquarientechnik, Germany) was attached to each of the CO<sub>2</sub> treated sumps to maintain pH at the desired level (8.00 or 7.90). A solenoid injected a slow stream of CO<sub>2</sub> into a powerhead at the bottom of the sump whenever the pH of the seawater rose above the set point. The powerhead rapidly dissolved CO<sub>2</sub> into the seawater and also served as a vigorous stirrer. Using this method it was possible to constantly maintain pH within ±0.05 units of the desired value. Equilibrated seawater from each sump was supplied at a rate of ~500 ml sec<sup>-1</sup> to four replicate 35 L aquariums, each housing two *P. fuscus*, as described above. To maintain oxygen levels and the required pCO<sub>2</sub> levels, aquariums were individually aerated with air (control ~400 µatm) or CO<sub>2</sub>-enriched air (~600 µatm or ~950 µatm). The concentration of CO<sub>2</sub>-enriched air was controlled by a scientific-grade pressure regulator and precision needle valve and measured continuously with an infrared CO<sub>2</sub> probe (Vaisala GM222).

Temperature and pH<sub>NBS</sub> of each aquarium was checked twice daily using a HQ40d pH meter (Hach, Colorado, USA), calibrated bi-weekly with fresh buffers (Merck). Total alkalinity of seawater (TA; µmol.kg<sup>-1</sup>SW) was estimated by Gran titrations from a total of 39 water samples. Average seawater pCO<sub>2</sub> was calculated with these parameters in the program CO2SYS using the constants of Mehrbach et al (1973) refit by Dickson and Millero (1987). pCO<sub>2</sub> estimated by seawater chemistry during olfactory tests were 450.63±0.64 µatm (control; mean ± SE), 630.09±0.78 µatm (mid) and 948.94±0.78 µatm (high; Table 1). pCO<sub>2</sub> estimates during the activity level and feeding behaviour tests were 444.02±0.44 µatm (control), 607.34±1.28 µatm (mid) and 925.49±0.69 µatm (high; Table 1).

### Experimental protocol

**Experiment 1 – Response of *Pseudochromis fuscus* to prey skin extracts.** Pairwise olfactory choice trials were run in a two channel chamber (600×250×110 mm), with a water depth of 90 mm. A centered 450 mm plastic barrier divided the chamber into two compartments of equal size. The small area along the back wall of the chamber was used as an acclimation area and separated from the rest of the chamber using 5 mm rigid mesh to maintain water flow through the chamber. Seawater was pumped directly from the ocean to a common reservoir, where it was gravity fed into two identical water outlets at the rear of the chamber at 7.21±0.77 L.min<sup>-1</sup>, and exited along outlets at the front of the chamber. Rigid mesh (5 mm) was placed directly in front of the outlets to aid in laminar flow and prevent concealment of *P. fuscus*. Two identical shelters were placed in both compartments, allowing for the water to move through the hide

**Table 1.** Seawater parameters for the olfactory and behavioural experiments. Values are means ( $\pm$  SE).

| Experiment | Treatment | pH <sub>NBS</sub> | Temp. (°C)  | Salinity (ppt) | Total Alkalinity ( $\mu\text{mol.kg}^{-1}\text{SW}$ ) | $\rho\text{CO}_2$ ( $\mu\text{atm}$ ) |
|------------|-----------|-------------------|-------------|----------------|-------------------------------------------------------|---------------------------------------|
| Olfaction  | Control   | 8.16 (0.01)       | 27.5 (0.01) | 34.8           | 2264.65 (2.58)                                        | 450.63 (0.64)                         |
|            | Mid       | 8.03 (0.01)       | 27.4 (0.1)  | 34.8           | 2264.65 (2.58)                                        | 630.09 (0.78)                         |
|            | High      | 7.88 (0.01)       | 27.5 (0.1)  | 34.8           | 2264.65 (2.58)                                        | 948.94 (0.74)                         |
| Activity   | Control   | 8.14 (0.01)       | 28.0 (0.03) | 34.8           | 2264.65 (2.58)                                        | 444.02 (0.44)                         |
|            | Mid       | 8.05 (0.01)       | 28.2 (0.05) | 34.8           | 2264.65 (2.58)                                        | 607.34 (1.28)                         |
|            | High      | 7.87 (0.01)       | 27.5 (0.1)  | 34.8           | 2264.65 (2.58)                                        | 925.49 (0.69)                         |

doi:10.1371/journal.pone.0022736.t001

and minimizing disruption to the flow. A 1.5 m long plastic 4 mm tube was attached to each water outlet, just below the surface of the water. Cues were injected via this tube allowing for their dispersion through the compartment. One channel of the chamber received the prey damaged-skin-extracts from juvenile *Pomacentrus moluccensis*. The other compartment received an equal quantity of seawater control with no additional chemical cues (i.e. a control). Dye trials indicated stimulus flow was even in the chamber compartments, flowing through the chambers and exiting at the front. The stimulus moved through the compartment at  $23 \pm 2.5 \text{ mm.sec}^{-1}$  and the chamber had been flushed after 4.5 min. All trials were undertaken at a constant temperature of 27°C. Fish were not fed for two days prior to trials to standardize for satiation. Control trials, where untreated seawater only was injected into both channels were randomly interspersed among trials with skin extracts. These trials confirmed that the fish used each compartment in approximately equal frequency when no additional cue was present.

At the start of each trial, a fish was placed in the barricaded area at the front of the chamber and allowed to acclimate for a minimum of four hours. Before the removal of the barrier, 60 ml of seawater was drawn through each of the tubes and discarded to remove stagnant water. Another 60 ml of seawater was drawn through the injection tubes and retained. 15 ml of the stimulus was then injected into each tube simultaneously, followed by the 60 ml of seawater previously removed, to flush the stimuli into the respective chamber compartments. The barrier was slowly removed and the behavioral observations commenced. Trials occurred over eight min and stimuli were re-injected at four min intervals. After the trial ceased, fish were once again retained in the acclimation area, and chambers were left to flush for approximately one hour. The compartments into which the stimuli were injected were swapped and the trial was repeated. Following the injection of the stimuli and the removal of the barrier, the location of the fish within the chamber was recorded every five seconds. Only the time spent in the channels of the chamber were included in the analysis as fish from all treatment groups within the control trials (SW vs SW) and treatment (prey skin extract vs SW) trials spent on average, less than 0.25 of their time in the acclimation area. As this time was minimal in the total time of the trial, removal of this period from the analysis was deemed to be acceptable. This exclusion was also due to fact that mixing of the cues could not be ruled out, as the water flowed out of the chamber. Dye trials indicated that some mixing could have been occurring in this small rear section of the chamber as the water moves out of the draining holes. Therefore, the time the fish were spending in this area was not necessarily indicative of a choice of cue, as fish could have been exposed to both the untreated seawater and the prey skin extract.

The sequence of the olfactory preference tests for the control and CO<sub>2</sub> treated fish were randomised throughout the duration of the experiment. Previous investigations, on different species, have indicated that testing in control water did not yield any differences to testing in CO<sub>2</sub> treated water [15–16] and thus all olfactory trials were conducted using control water. Observations were undertaken from behind a black barrier to minimise disturbance to fish.

**Preparation of experimental stimuli.** Prey cues were prepared using skin extracts from juvenile *Pomacentrus moluccensis*. Fish were euthanised by a quick blow to the head and placed in a clean petri dish. Vertical incisions were made along the flank of each fish using a scalpel blade, and the specimen was rinsed in 15 ml of seawater. Two damselfish (TL;  $22.04 \pm 0.65 \text{ mm}$ ; mean  $\pm$  SE) were used for each skin extract solution, with eight superficial cuts of similar size, made along each side of the flank to standardize for size.

**Experiment 2 – Activity levels and feeding behaviour of *Pseudochromis fuscus*.** Baseline activity levels of *P. fuscus* were recorded to discern potential differences between behaviours of fish treated with control seawater (current-day CO<sub>2</sub> levels) and those treated with elevated levels of CO<sub>2</sub> (mid and high CO<sub>2</sub> treatments). Trials were carried out in 35 L aquaria (390×300×290 mm) and behaviour was recorded by video cameras to prevent observer-induced behavioural responses. A 50×50 mm grid was laid at the bottom of the aquarium and was submerged by a 10 cm hollow PVC pipe shelter placed at the centre of one end. This shelter had two exit holes which were facing the tank walls, with the curved edge of the pipe against the tank wall furthest from the video camera, which was placed on a tripod above the aquarium. Fish were placed in aquaria with aeration for an hour acclimation period prior to recording their behaviour. Trials lasted 20 minutes, during which time aeration was terminated and fish were not disturbed. Following the 20 minutes activity trial, 25 individual INVE Aquaculture Nutrition pellets were introduced to the upper left corner of the tank via a long PVC pipe, to ensure food was introduced in a novel manner and reactions were not a result of human conditioning. Feeding activity and behaviour were recorded for a further five minutes. Ten, eight and seven fish were videoed from the controls, mid and high treatments respectively. All trials were conducted in control seawater, as a pilot study and previous investigations [14–15] indicated that testing in control versus CO<sub>2</sub> treated water has little to no effect on the results and that the effects of elevated CO<sub>2</sub> last for a number of days when fish are placed in control water.

The first minute of each recording was excluded from analysis to control for any disturbance caused by the observer exiting the laboratory. The number of line crosses both away from the shelter (i.e. parallel to the shelter) and across the tank (i.e. perpendicular to the shelter) were quantified from the videos. Two estimates of

activity were calculated. First, total cumulative distance from shelter was calculated by tallying all the linear excursions during which the fish moved away from the shelter (i.e. tallying just the line crosses parallel to the shelter). Cumulative distance moved from shelter was used as an indication of boldness for these highly cryptic species. Second, the total number of line crosses (both parallel and perpendicular) were tallied as an indication of overall movement throughout the tank, not just away from the shelter. For the five minutes following the addition of food the time to respond to the presence of food and the activity levels (line crosses) were recorded. Time to respond to food was the time from the introduction of the food until the first feeding strike. Feeding strikes were identified as directed rapid movements toward the introduced food, whether they were successful bites or not.

### Data analysis

The proportion of time spent in either side of the two channel chamber was determined from the total time that fish were not located in the acclimation area at the back of the chamber. Dye trials indicated that some mixing of water sources occurred in the acclimation area. Therefore, any time fish spent in this small area was not indicative of a choice, and was excluded from analysis. To determine if predators exhibited a preference for prey skin extract, the mean proportion of time spent in the stream of water containing prey skin extract was compared against the null-expectation of 0.5 for no preference. The mean time that individuals spent in the chamber channel with the prey skin extract was then compared among the control seawater and the two CO<sub>2</sub> treatments, using a one-factor analysis of variance (ANOVA) and a post-hoc Tukey's HSD means comparison tests. Assumptions of normality and homogeneity of variance were explored using residual analysis and deemed to be satisfied.

Movement and feeding behaviour were first compared among the three treatments with a multivariate ANOVA (MANOVA). One-factor ANOVAs with planned comparisons were then used to further explore any significant differences in behaviours between the CO<sub>2</sub> treated fish and non-treated fish. Residual analysis was used to determine whether data were normally distributed and homogenous in variance. A square-root transformation was applied in cases where data did not meet the assumptions of MANOVA.

## Results

### Response of *Pseudochromis fuscus* to prey skin extracts

Predators spent approximately equal proportions of time in both channels of the chamber when no additional odour was present (average proportions; Control = 0.47 ± 0.08, Mid = 0.47 ± 0.10, High = 0.50 ± 0.10); Fig. 1). *P. fuscus* treated in control seawater exhibited an attraction to the prey skin extract, spending significantly more than half their time in the compartment containing this cue ( $t = 2.621$ ,  $df = 9$ ,  $p = 0.028$ ). In contrast, *P. fuscus* treated in CO<sub>2</sub> enriched water spent significantly less than half their time in the channels containing prey skin extract (Mid = 2.577,  $df = 9$ ,  $p = 0.030$ ; High = 2.296,  $df = 13$ ,  $p = 0.039$ ). *P. fuscus* exposed to CO<sub>2</sub> enriched water spent approximately 20% less time in the water stream containing prey odor compared with control fish ( $F_{2,31} = 6.854$ ,  $p = 0.003$ ; Fig. 1).

### Effects on activity levels and feeding behaviour of *Pseudochromis fuscus*

Treatment in CO<sub>2</sub> enriched water had a significant effect on movement patterns of *P. fuscus* (Pillai's trace<sub>4,44</sub> = 0.412,  $p = 0.035$ ; Fig. 2). *P. fuscus* in the high CO<sub>2</sub> treatment displayed activity levels

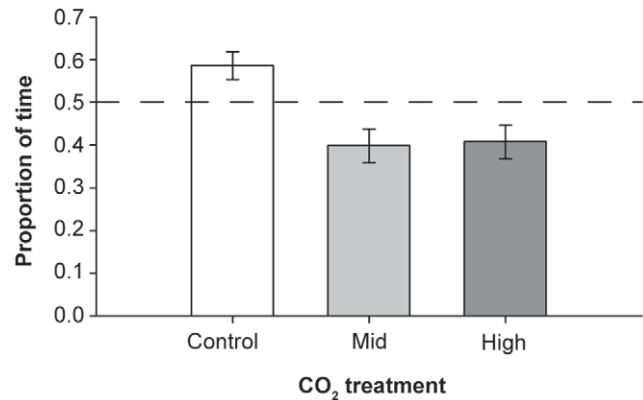

**Figure 1. Response of *Pseudochromis fuscus* to prey skin extracts.** Proportion of time (mean ± SE) spent in the channel receiving the prey skin extracts for *P. fuscus* exposed to control (n = 10), mid CO<sub>2</sub> (n = 10) and high CO<sub>2</sub> (n = 14) water treatments. Letters above bars indicate post-hoc Tukey's HSD groupings of means at  $p < 0.05$ . doi:10.1371/journal.pone.0022736.g001

double that of fish kept in control seawater, crossing  $269.14 \pm 55.76$  (mean ± SE) lines compared to  $139 \pm 16.54$  for the control fish ( $F_{2,22} = 3.459$ ,  $p = 0.049$  Fig. 2a). *P. fuscus* in the mid CO<sub>2</sub> treatment showed activity levels ( $143.50 \pm 43.97$  lines) similar to that of the control fishes. The cumulative distance moved away from shelter by *P. fuscus* in all treatments was not significantly affected by CO<sub>2</sub> treatment ( $F_{2,22} = 0.979$ ,  $p = 0.39$ ). However there was a trend for *P. fuscus* exposed to the elevated CO<sub>2</sub> treatments to move a greater cumulative distance than *P. fuscus* in kept in control seawater (Fig. 2b).

The feeding behaviour of *P. fuscus*, was significantly affected by treatment in CO<sub>2</sub> enriched water (Pillai's trace<sub>4,44</sub> = 0.402,  $p = 0.047$ ; Fig. 3). Time taken to respond to the introduction of food to the tank was significantly greater for the mid CO<sub>2</sub> treated fish ( $172.43 \pm 38.52$  sec) when compared to the controls ( $41.10 \pm 14.70$  sec;  $F_{2,21} = 4.616$ ,  $p = 0.022$ ; Fig. 3a), resulting in a delay in reaction by an average of two minutes. The effect of the high CO<sub>2</sub> treatment on time to respond to food was less severe, with reaction times of just over one minute (65.9 seconds) slower than control fish. The feeding strikes followed similar patterns; *P. fuscus* in the mid CO<sub>2</sub> treatment exhibited significantly fewer ( $8.14 \pm 2.91$ ) feeding strikes compared to control ( $21.1 \pm 3.96$ ) and high CO<sub>2</sub> treated fish ( $21.43 \pm 5.80$ ;  $F_{2,21} = 3.504$ ,  $p = 0.05$ ; Fig. 3b).

## Discussion

In this study, the first to investigate the effects of ocean acidification on the behaviour of a predatory fish, we show that the ability of a common meso-predator to detect chemical cues produced by its prey is hindered and activity levels are elevated by exposure to elevated CO<sub>2</sub>. *P. fuscus* naturally exhibited a preference for the olfactory cues of injured prey, however, following exposure to dissolved CO<sub>2</sub> concentrations that could be widespread in the ocean by the end of the century [7], they displayed a slight avoidance to these cues. Predators treated in control water spent approximately 60% of their time in the chamber channel containing prey skin extracts, but this value fell to around 40% in CO<sub>2</sub> treated fish. A change in reaction to olfactory cues is consistent with previous studies that have found that larval fish exposed to elevated CO<sub>2</sub> were unable to discriminate between ecologically important cues, becoming

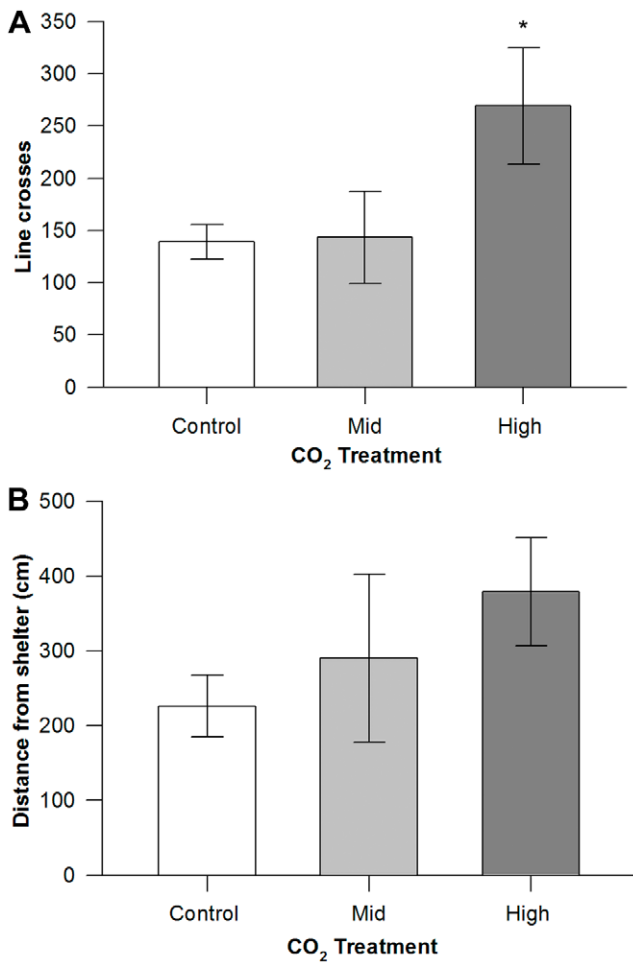

**Figure 2. Movement behaviour of *Pseudochromis fuscus*.** A. Mean ( $\pm$  SE) activity levels (denoted by line crosses) and B. mean cumulative distance moved from shelter for *P. fuscus* following exposure to control (n=10), mid CO<sub>2</sub> (n=8) and high CO<sub>2</sub> (n=7) water treatments. Significance from planned comparisons (control vs. high) at  $p < 0.05 = *$ . doi:10.1371/journal.pone.0022736.g002

attracted to cues they normally avoided [15,18] and exhibiting reduced preference for favourable cues [14]. This diminished preference could indicate a reduced ability to recognise the olfactory cues presented and is supported by the observation that CO<sub>2</sub> treated *P. fuscus* were more inquisitive and explored the entire chamber, compared to the more directional response towards the cue exhibited by control fish.

*P. fuscus* inhabit topographically complex reef habitats, potentially limiting the effectiveness of locating prey via visual information over long distances [42]. Olfactory cues are suggested to be important in initiating a foraging response in predators, with the release of the prey skin extract resulting in a directional movement of predators towards prey [37–38]. A shift from attraction to repulsion of favourable prey cues due to ocean acidification could result in a decrease in the predatory activity of meso-predators and a reduced ability to respond to fluctuations in food availability.

The potential exists for effects of elevated CO<sub>2</sub> on predator behaviour to counteract the increased risk of mortality posed to prey species. It is possible that reduced attraction of predators to damage-released skin extracts of prey, or even slight avoidance of the cue, could enhance the survival of prey. However, previous

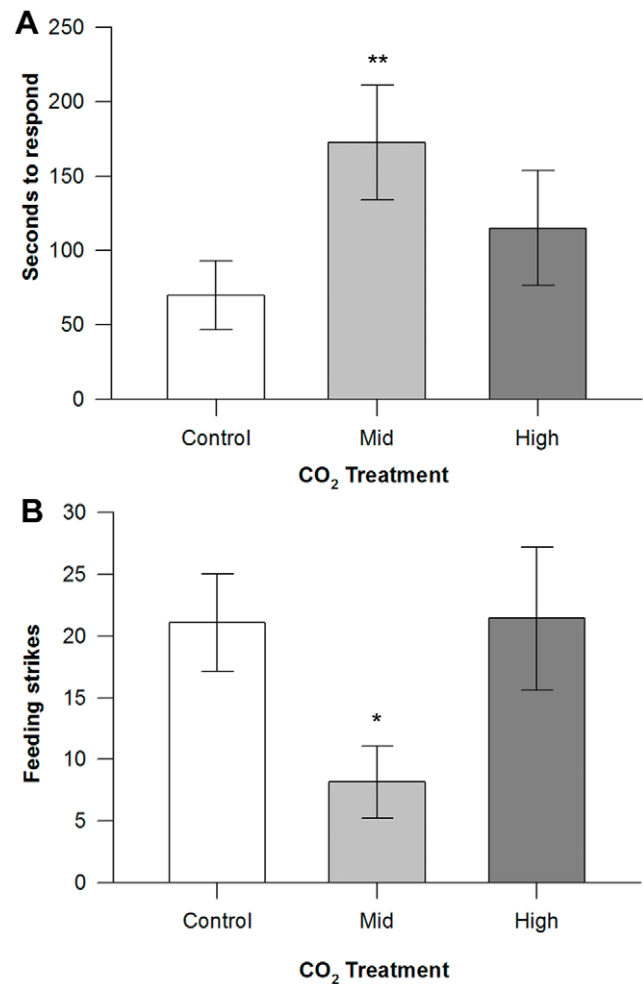

**Figure 3. Feeding behaviour of *Pseudochromis fuscus*.** A. Time to respond (seconds; mean  $\pm$  SE) and B. feeding strikes (mean  $\pm$  SE) of *P. fuscus* following exposure to control (n=9), mid CO<sub>2</sub> (n=7) and high CO<sub>2</sub> (n=7) water treatments. Significance from planned comparisons (control vs. mid CO<sub>2</sub>) at  $p < 0.01 = *$ ,  $p < 0.001 = **$ . doi:10.1371/journal.pone.0022736.g003

research addressing the effects of elevated CO<sub>2</sub> on newly-settled prey fishes indicates a dramatic switch from complete avoidance to strong preference for predator odour following exposure to CO<sub>2</sub> enriched water [15]. In contrast, the present study found that following CO<sub>2</sub> treatment predators spent 20% less time in a water stream containing the smell of injured prey.

Although both predator and prey are affected by the elevated CO<sub>2</sub>, the repercussions of the loss of predator avoidance by the settling fish is likely to be more detrimental for prey survival than can be offset by a small reduction in predator response to prey olfactory cues. This supports earlier suggestions that ocean acidification is a potential threat to replenishment of reef fish populations [14]. Further investigations addressing the loss of olfactory information coupled with other traits that are important in the outcome of predator-prey interactions, such as other sensory modalities, boldness and locomotor performance, would provide a more detailed indication of the likely impacts to future reef fish populations.

Avoidance of the beneficial olfactory cue of injured prey may be attributed to an alteration of neuro-sensory functioning following exposure to elevated CO<sub>2</sub> [14,17–18].

The inability to distinguish between important olfactory cues, such as predator and non-predator odour [15], and reduced attraction to prey skin extract shown in this study, could be caused by impaired transfer of chemosensory signals across the olfactory epithelium or some other disruption to the olfactory nervous system. Changes in activity levels and feeding behaviour, which are not necessarily associated with olfactory sensitivity, suggest that the physiological mechanisms responsible occur at a cellular level within the nervous system. For example, cellular changes caused by acid-base regulation in CO<sub>2</sub> exposed fish might affect neuronal pathways that mediate a range of functions, including olfactory discrimination and activity levels [17]. Detailed physiological studies would be required to test the possible mechanisms responsible for changes in olfactory responses and behaviour observed here and in previous studies.

A similar reduction in response to alarm cues has been described in freshwater fishes exposed to weakly acidic conditions [43–45]. However, the mechanisms involved are different to those responsible for the changes in behaviour observed here for *P. fuscus* and in larval fish exposed to elevated CO<sub>2</sub>. In the freshwater examples, exposure of the alarm cue to mineral acid (e.g. H<sub>2</sub>SO<sub>4</sub>) causes a non-reversible structural change in the alarm cue molecule, rendering it unrecognizable to the olfactory system [43]. In contrast, we presented the alarm cue in control water and it elicited a response in control fish as expected. Consequently, the changed behaviour of CO<sub>2</sub> treated *P. fuscus* was due to their exposure to CO<sub>2</sub>, not a change in the alarm cue itself. Furthermore, trials associated with another study [46] demonstrated that presenting the same prey skin extracts used here in either control or CO<sub>2</sub>-enriched water elicited the same strong avoidance behavior in larval damselfishes (DM Dixon, unpublished data) indicating that elevated CO<sub>2</sub> does not cause a chemical change in the cue in saltwater. However, it should be noted that this particular experiment does not address the possibility that in acidified water the prey alarm cues utilized could be subject to structural changes. Hearing is also affected by elevated CO<sub>2</sub>, indicating responses to CO<sub>2</sub> are not confined to the olfactory system [17]. This is further evidence that the various behavioural effects observed are not simply due to a change in the structure of chemical cues. Nevertheless, it is intriguing that two different acidification processes both affect behavioral responses of fish to alarm cues, with potentially important consequences in freshwater and marine ecosystems.

Enhanced activity levels and altered feeding responses of *P. fuscus* are similar to the findings of the effects of elevated CO<sub>2</sub> on newly settled fish. Munday and colleagues [14] found that following exposure to elevated CO<sub>2</sub> *Pomacentrus wardi* were bolder, move further from shelter, were more active and less responsive to threats when compared to control individuals. Given that *Pseudochromis fuscus* themselves may be prey to larger predators, incidental movement further from shelter due to altered behaviour could increase their vulnerability. This effect however, remains to be assessed in the field to determine if changes to activity levels influence exposure of *P. fuscus* to larger predators.

The olfactory abilities and activity levels of fishes have previously been investigated, however this is the first demonstration of the direct influence of elevated CO<sub>2</sub> on a predator's response to food. Delayed feeding response of *P. fuscus* in mid CO<sub>2</sub> could be attributed to their inability to detect the presence of food due to the disruption of their olfactory capabilities. For *P. fuscus* in the high CO<sub>2</sub> treatment, a faster response than the mid CO<sub>2</sub> treated fish and a similar number of feeding strikes to the control fishes might have occurred as a result of higher activity levels and greater behavioural boldness, which would facilitate food detec-

tion. Predatory fish use a variety of sensory cues to detect and locate prey, and although olfaction is often important [31], vision can also play an important role in prey detection and capture [47]. Increased activity in the high CO<sub>2</sub> treatment could have resulted in the fish relying more on vision than olfaction to detect food. Consequently, a consideration of all sensory abilities and behaviour, not just olfaction, will be important in determining the outcome of predator-prey interactions under acidified conditions. In one of the only other studies to investigate the potential effects of ocean acidification on predator-prey interactions, Bibby and colleagues [16] found that reduced shell thickness in the intertidal gastropod *Littorina littorea* at low seawater pH was associated with increased predator evasion behavior, which might help offset the increased risk of mortality in thin-shelled individuals. Therefore, the outcome of predator-prey interactions under changed environmental conditions can be complex and difficult to predict.

This study was carried out in laboratory conditions and thus, does not allow for a full evaluation of the potential effects of ocean acidification on the predatory ability and vulnerability of *P. fuscus* in their natural environment. Nevertheless, the effects observed suggest that the outcome of predator-prey interactions could be influenced by elevated pCO<sub>2</sub> in nature. Furthermore, as these were short-term experiments involving acute exposure to elevated CO<sub>2</sub>, the potential for fish to acclimate or adapt to rapid ocean acidification was not tested. Munday and others [14] found that the settlement-stage fish exposed to elevated CO<sub>2</sub> for four days exhibited almost identical impairment of their olfactory-mediated behavior as fish reared from birth at elevated CO<sub>2</sub>. Consequently, it does not seem likely that further increasing the duration of the CO<sub>2</sub> treatments by days to weeks would have affected the results of this experiment. Long-term rearing experiments over months to years will be required to determine if either predators or prey can acclimate to elevated CO<sub>2</sub> in the longer term. Munday and colleagues [14] also found that larval fish exhibited considerable variation in responses to acidification at approximately 700 ppm CO<sub>2</sub>, which suggests some capacity for selection of tolerant phenotypes. In contrast, *P. fuscus* did not exhibit an increase in individual variation in sensitivity at intermediate CO<sub>2</sub> levels, even though the CO<sub>2</sub> concentration (~650 µatm) was similar to that at which variation in responses was observed in larval fishes.

This study is the first to demonstrate the potential impacts of ocean acidification on a predatory fish, beyond the early life history stages. Combined effects of elevated CO<sub>2</sub> on attraction to prey odour and changes in general activity levels suggest that even moderate increases in atmospheric CO<sub>2</sub> affect the behaviour of meso-predators and the outcome of interactions between *P. fuscus* and their prey. Further investigations are required to determine and test the effects of changed behaviour on predator success in the field and the impact this has on prey populations. However, the extreme attraction to predator odour by larval fishes under acidified conditions, compared to the relatively small avoidance of prey cues by meso-predators detected in this study suggest that it is unlikely that negative effects on predators will fully compensate for the increase in mortality rates of larval fish returning to the reef in an acidified ocean.

## Acknowledgments

The reviewers are thanked for their insightful and detailed comments on the manuscript. Thank you to D. Dixon, B. Devine, L. Hughes, O. Lonnstedt and LIRS staff for their excellent assistance in the field. Special thanks to Dr Sue-Ann Watson for conducting the seawater chemistry and J. Welsh, M. Kramer and J. Cripps for helpful comments on the manuscript.

## Author Contributions

Conceived and designed the experiments: ILC PLM MIM. Performed the experiments: ILC. Analyzed the data: ILC. Contributed reagents/

materials/analysis tools: PLM MIM. Wrote the paper: ILC PLM MIM. Contributed funding and materials: PLM MIM ILC.

## References

1. Feely RA, Doney SC, Cooley SR (2009) Ocean acidification: present conditions and future changes in a high CO<sub>2</sub> world. *Oceanography* 22: 36–47.
2. Hoegh-Guldberg O, Bruno JF (2010) The impact of climate change on the world's marine ecosystems. *Science* 328: 1523–1528.
3. Kerr R (2010) Ocean acidification, unprecedented, unsettling. *Science* 328: 1500–1501.
4. Meehl GA, Stocker TF, Collins WD, Friedlingstein P, Gaye AT, et al. eds. *Climate Change 2007: The Physical Science Basis, Contribution of Working Group I to the Fourth Assessment Report of the Intergovernmental Panel on Climate Change*, Cambridge University Press, Cambridge, United Kingdom and New York, NY, USA. 996 p.
5. Caldeira K, Wickett ME (2005) Ocean model predictions of chemistry changes from carbon dioxide emissions to the atmosphere and ocean. *J Geophys Res* 110: C09S04.
6. Raven J, Caldeira K, Elderfield H, Hoegh-Guldberg O, Liss P, Riebesell U, Shepherd J, Turley C, Watson A (2005) Ocean acidification due to increasing atmospheric carbon dioxide policy document 12/0. The Royal Society London. pp 1–68.
7. Pelejero C, Calvo E, Hoegh-Guldberg O (2010) Paleo-perspectives on ocean acidification. *Trends Ecol Evol* 25: 332–344.
8. Orr JC, Fabry VJ, Aumont O, Bopp L, Doney SC, et al. (2005) Anthropogenic ocean acidification over the twenty-first century and its impact on calcifying organisms. *Nature* 437: 681–686.
9. Gazeau F, Quiblier C, Jansen JM, Gattuso J-P, Middelburg JJ, et al. (2007) Impact of elevated CO<sub>2</sub> on shellfish calcification. *Geophys Res Lett* 34: L07603.
10. Fabry VJ, Seibel BA, Feely RA, Orr JC (2008) Impacts of ocean acidification on marine fauna and ecosystem processes. *ICES J of Mar Sci* 65: 414–432.
11. Havenhand JN, Buttler F-R, Thorndyke MC, Williamson JE (2008) Near-future levels of ocean acidification reduce fertilization success in a sea urchin. *Curr Biol* 18: R651–R652.
12. Doney SC, Fabry VJ, Feely RA, Kleypas JA (2009) Ocean acidification: the other CO<sub>2</sub> problem. *Annu Rev Mar Sci* 1: 169–192.
13. Kleypas JA, Yates KK (2009) Coral reefs and ocean acidification. *Oceanogr* 22: 108–117.
14. Munday PL, Dixon DL, Donelson JM, Jones GP, Pratchett MS, et al. (2009) Ocean acidification impairs olfactory discrimination and homing ability of a marine fish. *Proc Natl Acad Sci U S A* 106: 1848–1852.
15. Dixon DL, Munday PL, Jones GP (2010) Ocean acidification disrupts the innate ability of fish to detect predator olfactory cues. *Ecol Lett* 13: 68–75.
16. Bibby R, Cleall-Harding P, Rundle S, Widdicombe S, Spicer J (2007) Ocean acidification disrupts induced defences in the intertidal gastropod *Littorina littorea*. *Biol Lett* 3: 699–701.
17. Simpson SD, Munday PL, Wittermich ML, Manassa R, Dixon DL, Gagliano M, Yan HY (2011) Ocean acidification erodes crucial auditory behaviour in a marine fish. *Biol Lett* doi: 10.1098/rsbl.2011.0293.
18. Munday PL, Dixon DL, McCormick MI, Meehan MG, Ferrari MCO, et al. (2010) Replenishment of fish populations is threatened by ocean acidification. *Proc Natl Acad Sci U S A* 107: 12930–12934.
19. Paine RT (1966) Food web complexity and species diversity. *Am Nat*. pp 65–75.
20. Hixon MA (1991) Predation as a process structuring coral reef fish communities. In: Sale PF, ed. *The ecology of fishes on coral reefs*, Academic Press Inc., San Diego. pp 475–507.
21. Bailey KM, Ciannelli L, Hunsicker M, Rindorf A, Neuenfeldt S, et al. (2010) Comparative analysis of marine ecosystems: workshop on predator-prey interactions. *Biol Lett* doi:10.1098/rsbl.2010.0326.
22. Beukers-Stewart BD, Jones GP (2004) The influence of prey abundance on the feeding ecology of two piscivorous species of coral reef fish. *J Exp Mar Biol Ecol* 299: 155–184.
23. Heinlein JM, Stier AC, Steele MA (2010) Predators reduce abundance and species richness of coral reef fish recruits via non-selective predation. *Coral Reefs* 29: 527–532.
24. Beets J (1997) Effects of a predatory fish on the recruitment and abundance of Caribbean coral reef fishes. *Marine Ecology Progress Series* 148: 11–21.
25. Almany GR, Webster MS (2004) Odd species out as predators reduce diversity of coral-reef fishes. *Ecology* 85: 2933–2937.
26. Almany GR, Webster MS (2006) The predation gauntlet: early post-settlement mortality in reef fishes. *Coral Reefs* 25: 19–22.
27. Carr M, Hixon M (1995) Predation effects on early post-settlement survivorship of coral-reef fishes. *Mar Ecol Prog Ser* 124: 31–42.
28. Holbrook SJ, Schmitt RJ (2002) Competition for shelter space causes density-dependent predation mortality in damselfishes. *Ecology* 83: 2855–2868.
29. Holmes TH, McCormick MI (2010) Size-selectivity of predatory reef fish on juvenile prey. *Mar Ecol Prog Ser* 399: 273–283.
30. Hara TJ (2006) Feeding behaviour in some teleosts is triggered by single amino acids primarily through olfaction. *J Fish Biol* 68: 810–825.
31. Ishii Y, Shimada M (2010) The effect of learning and search images on predator-prey interactions. *Popul Ecol* 52: 27–35.
32. Wisenden BD (2000) Olfactory assessment of predation risk in the aquatic environment. *Proc Roy Soc B* 355: 1205–1208.
33. Atema J (1980) Chemical senses, chemical signals and feeding behavior in fishes. In: Bardach JE, Magnuson JJ, May RC, Reinhart JM, eds. *Fish behaviour and its use in the capture and culture of fishes*, ICLARM Conference Proceedings 5, International Centre for Living Aquatic Resources Management, Manila, Philippines. pp 57–101.
34. Hara TJ (1994) The diversity of chemical stimulation in fish olfaction and gustation. *Rev Fish Biol Fish* 4: 1–35.
35. Hay ME (2009) Marine chemical ecology: chemical signals and cues structure marine populations, communities, and ecosystems. *Annu Rev Mar Sci* 1: 193–212.
36. Ferrari MCO, Wisenden BD, Chivers DP (2010) Chemical ecology of predator-prey interactions in aquatic ecosystems: a review and prospectus. *Can J Zool* 88: 698–724.
37. Mathis A, Chivers DP, Smith RJF (1995) Chemical alarm signals: predator deterrents or predator attractants? *Am Nat* 145: 994–1005.
38. Chivers DP, Brown GE, Smith RJF (1996) The evolution of chemical alarm signals: attracting predators benefits alarm signal senders. *Am Nat* 148: 649–659.
39. Bernstein L, Bosch P, Canziani O, Chen Z, Christ R, et al. (2007) Summary for Policymakers of the Synthesis Report. In *Climate Change 2007: Fourth Assessment Report of the Intergovernmental Panel on Climate Change* Allali A, et al. eds. Cambridge University Press, Cambridge. 22 p.
40. Munday PL, Wilson SK (1997) Comparative efficacy of clove oil and other chemicals in anaesthetization of *Pomacentrus amboinensis*, a coral reef fish. *J Fish Biol* 51: 931–938.
41. Beukers JS, Jones GP (1998) Habitat complexity modifies the impact of piscivores on a coral reef fish population. *Oecologia* 114: 50–59.
42. Brown GE, Cowan J (2000) Foraging trade-offs and predator inspection in an Ostariophysan fish: switching from chemical to visual cues. *Behaviour* 137: 181–195.
43. Brown GE, Adrian Jr. JC, Lewis MG, Towe JM (2002) The effects of reduced pH on chemical alarm signalling in ostariophysan fishes. *Can J Fish Aquat Sci* 59: 1331–1338.
44. Leduc AOHC, Noseworthy MK, Adrian Jr. JC, Brown GE (2003) Detection of conspecific and heterospecific alarm signals by juvenile pumpkinseed under weak acidic conditions. *J Fish Biol* 63: 1331–1336.
45. Leduc AOHC, Kelly JM, Brown GE (2004) Detection of conspecific alarm cues by juvenile salmonids under neutral and weakly acidic conditions: laboratory and field tests. *Oecologia* 139: 318–324.
46. Ferrari MCO, Dixon DL, Munday PL, McCormick MI, Meehan MG, et al. (2011) Intrageneric variation in antipredator responses of coral reef fishes affected by ocean acidification: implications for climate change projections on marine communities. *Glob Change Biol*, doi: 10.1111/j.1365-2486.2011.02439.x.
47. Gerking SD (1994) *Feeding ecology of fish*. Academic Press, San Diego. pp 15–39.
